# Supplementary material
Source: Royal Society of Chemistry journal article supplement (https://www.rsc.org/suppdata/cc/1999/1523/903257f.doc)
Supplement: Supplementary file 1 [file 903257f.doc]

**Electrocatalytic Reduction of Dioxygen to Water by TREN-capped Porphyrins, Functional Models of Cytochrome *c* Oxidase.**

David Ricard,† Bruno Andrioletti,† Maurice L'Her ,*‡ and Bernard Boitrel*†

Supplementary Data

Figure 2: Rotating ring-disk voltammetry for O2 reduction; graphite disk impregnated with **2** or **4.** pH = 6.86; Nr *= 250 rpm;* reference: SCE; pO2 = 1atm; potential of the platinum ring-electrode: 0.8V.

a: bare graphite electrode (EPGE)

b,c: first and third consecutive voltammogram after coating with **4** (3C1FeCu)

d: after coating with **2** (3C1Fe)

**Experimental Section**

The diameter of the edge plane graphite electrode (EPGE) disk is 6mm; the collecting efficiency of the ring-disk electrode is 27% (Pine Instrument Co.). The graphite electrode is modified by dipping it 5 minutes in the solution of the catalyst in CHCl3. A bipotentiostat (Solea-Tacussel) pilots the disk potential, when the platinum ring is maintained at 0.8V *vs* SCE for experiments at pH 6.86 (KH2PO4 0.025M + Na2HPO4 0.025M) and 1.0V for measurements in acidic media. The catalyst was adsorbed on an edge-plane graphite electrode (EPGE), a disk surrounded by a platinum ring which potential is maintained at a suitable value to detect H2O2 eventually produced, through its oxidation.

**3**: **(i)** CH2=CHCOCl, NEt3, THF; **(iv)** In a glove-box (less than 1ppm of dioxygen), the porphyrin functionalized by four Michael acceptor (200mg, 0.22mmol), obtained in the previous step is dissolved in THF (75 mL) and heated at 55°C. Then, ten drops of 2,6-lutidine are added and a 5 fold-excess of iron(II) bromide. After 5 hours, the mixture is dried, redissolved in CH2Cl2, filtered on a celite plug, and then dried again (yield = 90%). The lack of atropisomerization is checked by NMR spectroscopy: 1H NMR 500 MHz (** ppm, pyridine-d5, 323K): 8.82 (d, *J* = 7.0 Hz, 4H, aro); 8.74 (s, 8H, -pyr.); 8.23 (large s, 4H, -NHCO); 7.98 (d, *J* = 7.0 Hz, 4H, aro); 7.77 (t, *J* = 7.5 Hz, 4H, aro); 7.47 (t, *J* = 7.5 Hz, 4H, aro); 5.90 (d, *J* = 17.0 Hz, 4H, -CH=); 5.17 (m, 4H, =CH2); 5.06 (m, 4H, =CH2). **(v)** The iron(II) Michael acceptor porphyrin is dissolved in a mixture of CHCl3/MeOH (20/1: v/v) and heated at 50°C. TREN (*Tris*-(2-aminoethyl amine)) (1 eq) is added and heating is maintained 14 hours after what the solvent is evaporated and the compound is dissolved in CH2Cl2, washed with a NaHCO3 saturated aqueous solution, and purified by flash chromatography on silica-gel. Yield = 64%. HRMS (LSIMS): m/z 1091.4132 calculated for C62H59N12O4Fe [M - H]+, found 1091.4160. **(vi)** The capped iron(II) porphyrin is dissolved in CH3CN and refluxed. Excess of CuBr is added and heating is continued for 12 hours. After filtration of the salt, the nitrogen base is added to stabilize the complex. HRMS (LSIMS): m/z 1169.3299 calculated for C62H58N12O5FeCu [M+•], found 1169.3324.

**4**: **(ii)** CH3COCl, NEt3, THF, 0°C; **(iii)** ClCH2COCl, NEt3, THF; further steps are identical to the one described for compound **3**. Before copper insertion, HRMS (LSIMS): m/z 1036.3586 calculated for C58H52N12O4Fe [M+•], found 1036.3527.
